# Supplementary material for: The synthesis of organic charge transfer hetero-microtubules by crack welding
Source: Royal Society of Chemistry journal article supplement (doi:10.1039/c4cc04602a), 2014-01-01
Supplement: c4cc04602a1.pdf [file c4cc04602a1.pdf]

## Supporting Information

### **Synthesis of Organic Charge Transfer Hetero-Microtubules by Crack-Welding**

J. Kim,<sup>a</sup> J. Chung,<sup>a</sup> J. Hyon,<sup>a</sup> T. Kwon,<sup>a</sup> C. Seo,<sup>a</sup> J. Nam,<sup>a</sup> Y. Kang<sup>a\*</sup>

<sup>a</sup> Department of Chemistry, Research Institute for Natural Sciences, and Institute of Nano Science and Technology, Hanyang University, 222 Wangsimni-Ro, Seongdong-Gu, Seoul, 133-791 (Korea)

\* e-mail: [youngjkang@hanyang.ac.kr](mailto:youngjkang@hanyang.ac.kr)

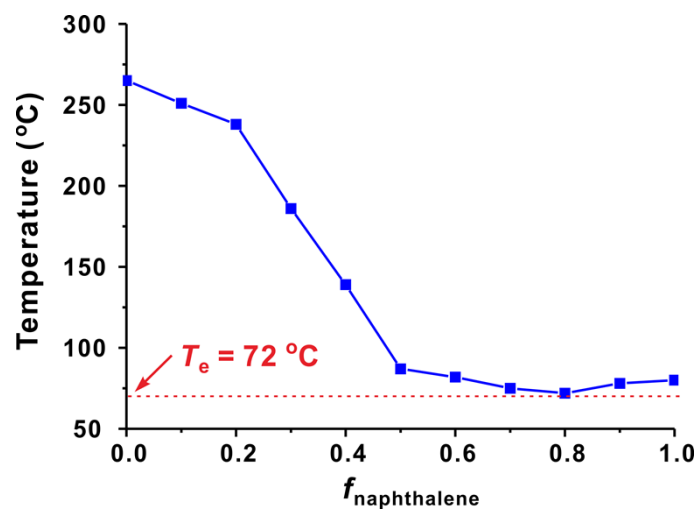

**Figure S1.** a) The change of melting point for the mixtures of TCNB and naphthalene as a function of the weight fraction of naphthalene ( $f_{\text{naphthalene}}$ ). The lowest melting temperature corresponding to the eutectic temperature was measured at  $T_e = 72^\circ\text{C}$  when the composition was  $f_{\text{naphthalene}} = 0.8$ . Melting temperatures were determined by using DSC.
